# Supplementary material for: The attitude of patients with progressive ataxias towards clinical trials
Source: Orphanet J Rare Dis. 2022 Jan 4;17:1. doi: 10.1186/s13023-021-02091-x (PMC8729009; doi:10.1186/s13023-021-02091-x)
Supplement: Supplementary file 3 — Additional file 3: Reasons for trial participation. [file 13023_2021_2091_MOESM3_ESM.xlsx]

## Sheet: table S2 - Reasons for trial pa
Reasons for trial participation
	Potential benefit to self	Potential benefit to others	Feeling of increased care/obtaining extra health check ups	Feeling valued	Financial reimbursement of expenses (covering costs of travel and accommodation if applicable)	Recommendation of trial by physician	Recommendation of trial by patient support organization	Recommendation from friend with same condition	Social media advertising	Person of contact within clinical trial team	Availability of physician should there be any issues	Webinar to discuss trial before starting	Other (please specify)
FRDA
ambulant n = 33	30	27	8	9	23	13	8	7	0	12	17	7	0
aids n = 40	38	34	11	4	25	18	6	2	1	13	16	10	1
wheelchair n = 89	81	70	23	29	54	52	18	11	5	34	47	11	2
all n= 162	149	131	42	42	102	83	32	20	6	59	80	28	3
%age	91.9753	80.8642	25.9259	25.9259	62.963	51.2346	19.7531	12.3457	3.7037	36.4198	49.3827	17.284	1.85185
trial naive n = 54	50	42	12	8	34	31	10	5	3	16	31	16	1
one trial n = 45	45	34	14	12	31	22	12	6	2	20	22	6	1
multiple trials n = 57	49	52	15	20	35	27	9	7	1	21	23	6	1
Inherited CA
ambulant n = 18	15	15	4	3	3	7	3	0	0	3	13	4	2
aids n = 20	18	18	9	7	6	8	2	1	0	7	9	2	0
wheelchair n = 4	4	3	2	2	2	0	1	0	0	3	2	1	0
all n = 42	37	36	15	12	11	15	6	1	0	13	24	7	2
%age	88.0952	85.7143	35.7143	28.5714	26.1905	35.7143	14.2857	2.38095	0	30.9524	57.1429	16.6667	4.7619
Idiopathic CA
ambulant n=12	12	10	5	3	3	7	2	0	0	3	6	0	0
aids n=33	31	25	17	10	12	15	4	1	3	12	23	9	0
wheelchair n=4	3	4	3	1	0	2	0	0	0	1	3	1	0
all n= 49	46	39	25	14	15	24	6	1	3	16	32	10	0
%age	93.8776	79.5918	51.0204	28.5714	30.6122	48.9796	12.2449	2.04082	6.12245	32.6531	65.3061	20.4082	0
all conditions %age	91.6996	81.4229	32.4111	26.8775	50.5929	48.2213	17.3913	8.69565	3.55731	34.7826	53.7549	17.7866	1.97628
