# Supplementary material for: The attitude of patients with progressive ataxias towards clinical trials
Source: Orphanet J Rare Dis. 2022 Jan 4;17:1. doi: 10.1186/s13023-021-02091-x (PMC8729009; doi:10.1186/s13023-021-02091-x)
Supplement: Supplementary file 7 — Additional file 7: Trial design. [file 13023_2021_2091_MOESM7_ESM.xlsx]

## Sheet: table S6 - Trial burden and inv
Trial burden and investigations
	What is the maximum length of each visit you would be willing to come in to hospital for in a medication clinical trial? (choose one)					What is the maximum one-way length of travel door to door you would be prepared to undergo to participate in a medication clinical trial? (choose one)					Which of the following procedures would you feel comfortable undergoing as part of a medication clinical trial? (select all which are applicable)	amb=35, aid =46, wheel=94	naive=62, multiple =61, once =49
	2:00:00	4:00:00	6:00:00	8:00:00	2	0:30:00	1-2hr	3-4 hr	5-6hr	>7hr	Telephone conversation with doctor	Respond to questionnaire	At - home monitoring of vital signs eg. using Fitbit or Apple watch	Neurological examination in hospital	Urine sample in hospital	Blood test in hospital	Fasting <6 hours	Fasting >6 hours	*Scans (eg. MRI, CT, PET) <1 hour	*Scans (eg. MRI, CT, PET) >1 hour	Overnight stay in hospital	**Muscle biopsy	***Lumbar puncture	Exercise test (eg. seated bike)
FRDA
ambulant n	2	4	3	9	17	0	3	12	5	15	34	32	30	34	32	32	22	21	29	30	25	15	15	32
ambulant %age	5.71429	11.4286	8.57143	25.7143	48.5714	0	8.57143	34.2857	14.2857	42.8571	97.1429	91.4286	85.7143	97.1429	91.4286	91.4286	62.8571	60	82.8571	85.7143	71.4286	42.8571	42.8571	91.4286
aids n	3	13	4	4	22	3	9	9	9	16	42	44	38	43	42	42	36	30	38	32	32	30	26	38
aids %age	6.52174	28.2609	8.69565	8.69565	47.8261	6.52174	19.5652	19.5652	19.5652	34.7826	91.3043	95.6522	82.6087	93.4783	91.3043	91.3043	78.2609	65.2174	82.6087	69.5652	69.5652	65.2174	56.5217	82.6087
wheelchair n	12	16	13	8	47	5	26	20	15	30	79	82	83	86	79	86	77	59	78	63	55	48	42	65
wheelchair %age	12.5	16.6667	13.5417	8.33333	48.9583	5.20833	27.0833	20.8333	15.625	31.25	82.2917	85.4167	86.4583	89.5833	82.2917	89.5833	80.2083	61.4583	81.25	65.625	57.2917	50	43.75	67.7083
all %age	9.60452	18.6441	11.2994	11.8644	48.5876	4.51977	21.4689	23.1638	16.3842	34.4633	87.5706	89.2655	85.3107	92.0904	86.4407	90.3955	76.2712	62.1469	81.9209	70.6215	63.2768	52.5424	46.8927	76.2712
trial naive	10	18	8	7	19	5	22	14	8	13	48	54	52	56	49	51	38	32	46	37	31	28	25	44
trial naive %age	16.129	29.0323	12.9032	11.2903	30.6452	8.06452	35.4839	22.5806	12.9032	20.9677	77.4194	87.0968	83.871	90.3226	79.0323	82.2581	61.2903	51.6129	74.1935	59.6774	50	45.1613	40.3226	70.9677
one trial	3	11	7	7	21	1	7	12	12	17	46	44	41	48	46	47	40	26	44	35	33	23	18	39
one trial %age	6.12245	22.449	14.2857	14.2857	42.8571	2.04082	14.2857	24.4898	24.4898	34.6939	93.8776	89.7959	83.6735	97.9592	93.8776	95.9184	81.6327	53.0612	89.7959	71.4286	67.3469	46.9388	36.7347	79.5918
multiple trials	3	4	4	7	43	1	7	14	9	30	59	57	56	58	56	60	55	51	54	52	47	42	40	52
multiple trials %age	4.91803	6.55738	6.55738	11.4754	70.4918	1.63934	11.4754	22.9508	14.7541	49.1803	96.7213	93.4426	91.8033	95.082	91.8033	98.3607	90.1639	83.6066	88.5246	85.2459	77.0492	68.8525	65.5738	85.2459
<15-25	5	8	4	2	18	2	8	11	6	10	29	30	26	34	28	30	22	18	29	24	23	14	14	28
<15-25 %age	13.5135	21.6216	10.8108	5.40541	48.6486	5.40541	21.6216	29.7297	16.2162	27.027	78.3784	81.0811	70.2703	91.8919	75.6757	81.0811	59.4595	48.6486	78.3784	64.8649	62.1622	37.8378	37.8378	75.6757
26-35	2	5	3	7	25	1	7	7	8	21	41	41	39	41	39	42	37	29	38	32	30	24	23	36
26-35 %age	4.7619	11.9048	7.14286	16.6667	59.5238	2.38095	16.6667	16.6667	19.0476	50	97.619	97.619	92.8571	97.619	92.8571	100	88.0952	69.0476	90.4762	76.1905	71.4286	57.1429	54.7619	85.7143
36-45	1	6	4	8	17	1	7	4	7	17	33	35	34	33	33	34	31	28	30	30	24	23	19	27
36-45 %age	2.77778	16.6667	11.1111	22.2222	47.2222	2.77778	19.4444	11.1111	19.4444	47.2222	91.6667	97.2222	94.4444	91.6667	91.6667	94.4444	86.1111	77.7778	83.3333	83.3333	66.6667	63.8889	52.7778	75
46-55	2	6	6	4	14	2	8	12	2	8	28	29	30	30	29	29	25	18	27	23	21	17	17	25
46-55 %age	6.25	18.75	18.75	12.5	43.75	6.25	25	37.5	6.25	25	87.5	90.625	93.75	93.75	90.625	90.625	78.125	56.25	84.375	71.875	65.625	53.125	53.125	78.125
>56	5	8	3	0	10	2	7	7	6	4	24	23	22	25	24	25	20	17	21	19	14	15	10	19
>56 %age	19.2308	30.7692	11.5385	0	38.4615	7.69231	26.9231	26.9231	23.0769	15.3846	92.3077	88.4615	84.6154	96.1538	92.3077	96.1538	76.9231	65.3846	80.7692	73.0769	53.8462	57.6923	38.4615	73.0769
Inherited CA
ambulant n = 25	2	10	3	6	4	2	14	5	0	4	21	19	19	22	21	22	17	12	19	15	14	11	9	18
%	8	40	12	24	16	8	56	20	0	16	84	76	76	88	84	88	68	48	76	60	56	44	36	72
aids n = 15	2	3	2	3	5	3	5	2	1	4	12	14	15	14	14	14	10	10	14	12	9	7	4	12
%	13.3333	20	13.3333	20	33.3333	20	33.3333	13.3333	6.66667	26.6667	80	93.3333	100	93.3333	93.3333	93.3333	66.6667	66.6667	93.3333	80	60	46.6667	26.6667	80
wheelchair n = 4	1	1	0	0	2	0	1	3	0	0	1	3	1	2	1	2	2	2	3	3	2	1	1	2
%	25	25	0	0	50	0	25	75	0	0	25	75	25	50	25	50	50	50	75	75	50	25	25	50
all %age	11.3636	31.8182	11.3636	20.4545	25	11.3636	45.4545	22.7273	2.27273	18.1818	77.2727	81.8182	79.5455	86.3636	81.8182	86.3636	65.9091	54.5455	81.8182	68.1818	56.8182	43.1818	31.8182	72.7273
Idiopathic CA
ambulant n=13	6	1	2	2	2	4	8	1	0	0	6	10	5	10	8	7	5	2	9	4	6	4	5	9
%	46.1538	7.69231	15.3846	15.3846	15.3846	30.7692	61.5385	7.69231	0	0	46.1538	76.9231	38.4615	76.9231	61.5385	53.8462	38.4615	15.3846	69.2308	30.7692	46.1538	30.7692	38.4615	69.2308
aids n=37	8	8	5	3	13	8	15	7	1	6	24	26	22	32	26	29	17	9	29	17	20	16	13	27
%	21.6216	21.6216	13.5135	8.10811	35.1351	21.6216	40.5405	18.9189	2.7027	16.2162	64.8649	70.2703	59.4595	86.4865	70.2703	78.3784	45.9459	24.3243	78.3784	45.9459	54.0541	43.2432	35.1351	72.973
wheelchair n=3	1	1	0	0	1	0	3	0	0	0	4	4	1	3	3	3	2	1	3	1	1	3	2	1
%	33.3333	33.3333	0	0	33.3333	0	100	0	0	0	133.333	133.333	33.3333	100	100	100	66.6667	33.3333	100	33.3333	33.3333	100	66.6667	33.3333
all n= 53	28.3019	18.8679	13.2075	9.43396	30.1887	22.6415	49.0566	15.0943	1.88679	11.3208	64.1509	75.4717	52.8302	84.9057	69.8113	73.5849	45.283	22.6415	77.3585	41.5094	50.9434	43.3962	37.7358	69.8113
												0.854015	0.781022	0.89781	0.824818	0.864964	0.686131	0.532847	0.810219	0.645985	0.59854	0.492701	0.427007	0.744526
